# Supplementary material
Source: HighWire-hosted journal article supplement (https://gh.bmj.com/content/2/2/e000213)
Supplement: inline-supplementary-material-1 [file inline-supplementary-material-1.pdf]

## Supplementary Material

### APPENDIX A. Survey forms (all languages) used for non-domestic migrant workers, HealthServe clinics and foreign worker dormitory, 23 July- 28 August, 2016

Background: The purpose of this survey is to better understand the health needs and healthcare issues faced by migrant workers in Singapore. This survey will take approximately **10 minutes** to complete. This survey is voluntary and your responses will be kept confidential.

#### Section A: Personal and Sociodemographic Information

A1. Age: \_\_\_\_\_

A2. Gender: Male / Female

A3. Nationality:

☐ Bangladeshi    ☐ Chinese    ☐ Indian    ☐ Burmese    ☐ Filipino

☐ Others: \_\_\_\_\_

A4. Marital Status: Single / Married / Widowed / Separated

A5. No. of people supported: \_\_\_\_\_

A6. Work Industry:

☐ Construction    ☐ Shipyard/Marine    ☐ Food and Beverages    ☐ Maintenance

☐ Unemployed    ☐ Others (please specify): \_\_\_\_\_

A7. Highest Education completed:

☐ Primary or less    ☐ Secondary    ☐ Post-secondary

A8. Basic monthly salary (excluding overtime): SGD\$ \_\_\_\_\_

A9. Average working hrs/week: \_\_\_\_\_

A10. No. of rest days/month: \_\_\_\_\_

A11. Duration in Singapore (years): \_\_\_\_\_

A12. Type of entry visa:

☐ Work Permit    ☐ 'S' Pass    ☐ Employment Pass

☐ Others (please specify): \_\_\_\_\_

A13. Language(s) spoken:

☐ English    ☐ Bengali    ☐ Tamil    ☐ Hindi    ☐ Mandarin    ☐ Burmese    ☐ Malay

☐ Others: \_\_\_\_\_

### Section B: Healthcare Usage

B1. Have you seen a doctor in Singapore before (besides for your pre-employment medical exam)?

☐ Yes ☐ No ☐ Unsure

B2. During the past 12 months, approximately how many times did you visit the following (excluding current clinic visit if applicable):

Company Doctor ☐ 0 ☐ 1 ☐ 2 ☐ 3 ☐ > 3

Private General Practitioner ☐ 0 ☐ 1 ☐ 2 ☐ 3 ☐ > 3

Healthserve Clinic ☐ 0 ☐ 1 ☐ 2 ☐ 3 ☐ > 3

Government Polyclinic ☐ 0 ☐ 1 ☐ 2 ☐ 3 ☐ > 3

Government Hospital ☐ 0 ☐ 1 ☐ 2 ☐ 3 ☐ > 3

Others (please specify) : \_\_\_\_\_ ☐ 0 ☐ 1 ☐ 2 ☐ 3 ☐ > 3

B3. Have you ever been hospitalized (at least 1 night stay) in Singapore?

☐ Yes ☐ No ☐ Unsure

### Section C: Healthcare Affordability

C1a. During your time in Singapore, was there any time when you did not seek medical care because of cost?

☐ Yes ☐ No ☐ Unsure

C1b. During your time in Singapore, was there any time when you needed prescription medications but did not get them because of cost?

☐ Yes ☐ No ☐ Unsure

C1c. During your time in Singapore, was there ever any time when you needed specialist care (including follow up appointments) or referral to a tertiary hospital but did not do so because of cost?

☐ Yes ☐ No ☐ Unsure

C2a. Do you have health insurance?

☐ Yes ☐ No ☐ Unsure

C2b. Does your health insurance cover for your:

Inpatient medical expenses: ☐ Yes (if yes, state amount if known \$\_\_\_\_\_) ☐ No ☐ Unsure

Outpatient medical expenses: ☐ Yes (if yes, state amount if known \$\_\_\_\_\_) ☐ No ☐ Unsure

C2c. Were you provided a copy of your health insurance policy/information on employment?

☐ Yes ☐ No ☐ Unsure

If Yes, was this provided in your own native language? ☐ Yes ☐ No

C3a. If you get **injured while working** and have to be **hospitalized**, who pays for the cost of treatment? (tick all that apply)

☐ Company ☐ Insurance ☐ Self ☐ Don't know

C3b. If you fall sick (**non work-related**) and have to be **hospitalized**, who pays for the cost of treatment? (tick all that apply)

☐ Company ☐ Insurance ☐ Self ☐ Don't know

C3c. If you fall sick (**non work-related**) and have to get **outpatient treatment**, who pays for the cost of treatment? (tick all that apply)

☐ Company ☐ Insurance ☐ Self ☐ Don't know

#### Section D: Other barriers to access

D1. Does your employer recognize Medical Certificates (MCs) (sick/outpatient leave) from:

Company Doctor ☐ Yes ☐ No ☐ Unsure ☐ No company doctor

Private General Practitioner ☐ Yes ☐ No ☐ Unsure

Healthserve Clinic ☐ Yes ☐ No ☐ Unsure

Government Polyclinic/ Hospital ☐ Yes ☐ No ☐ Unsure

D2a. Does your company pay your daily wages if you are on sick/outpatient leave with MC?

☐ Yes ☐ No, wages for the day are held ☐ Unsure

D2b. Does your company pay your daily wages if you are on hospitalization leave with MC?

☐ Yes ☐ No, wages for the day are held ☐ Unsure

D2c. Does your company have a policy of only accepting company doctor sick/outpatient leave MCs?

☐ Yes   ☐ No   ☐ Unsure   ☐ No company doctor

D2d. Have you had your pay deducted because you took sick/outpatient leave, even with an MC?

☐ Yes   ☐ No   ☐ Unsure   Comments(if any): \_\_\_\_\_

D2e. Have you had your pay deducted because you took hospitalization leave, even with an MC?

☐ Yes   ☐ No   ☐ Unsure   Comments(if any): \_\_\_\_\_

D3a. Do you know of anyone who has had their pay deducted because he took sick/outpatient leave, even with an MC?

☐ Yes   ☐ No   ☐ Unsure

D3b. Do you know of anyone who has had their pay deducted because he took hospitalization leave, even with an MC?

☐ Yes   ☐ No   ☐ Unsure

D4. Are you afraid of losing your job or being sent home if you fall sick?

☐ Yes   ☐ No   ☐ Unsure

#### Section E: General Health Perception

E1. On a scale of 1 to 10, how healthy do you think you are?

|                          |                          |                          |                          |                          |                          |                          |                          |                          |                          |
|--------------------------|--------------------------|--------------------------|--------------------------|--------------------------|--------------------------|--------------------------|--------------------------|--------------------------|--------------------------|
| <input type="checkbox"/> |
| 1                        | 2                        | 3                        | 4                        | 5                        | 6                        | 7                        | 8                        | 9                        | 10                       |

Very unhealthy

Moderate

Very healthy

E2. On a scale of 1 to 10, how healthy do you think you were before you came to Singapore?

|                          |                          |                          |                          |                          |                          |                          |                          |                          |                          |
|--------------------------|--------------------------|--------------------------|--------------------------|--------------------------|--------------------------|--------------------------|--------------------------|--------------------------|--------------------------|
| <input type="checkbox"/> |
| 1                        | 2                        | 3                        | 4                        | 5                        | 6                        | 7                        | 8                        | 9                        | 10                       |

Very unhealthy

Moderate

Very healthy

E3a. Do you have any chronic medical problems? (e.g. hypertension, diabetes, asthma etc)

☐ Yes   If Yes, please list: \_\_\_\_\_   ☐ No

\_\_\_\_\_  
\_\_\_\_\_

E3b. If Yes to E3a, do you see a doctor **regularly** for your chronic medical problems?

☐ Yes   ☐ No (If No, Why? \_\_\_\_\_)   ☐ NA

**Section F: Kessler-6 Scale**

F1. During the past 30 days, about how often did you feel .....

|                                                       | All of the<br>time       | Most of<br>the time      | Some of<br>the time      | A little of<br>the time  | None of<br>the time      |
|-------------------------------------------------------|--------------------------|--------------------------|--------------------------|--------------------------|--------------------------|
| a ...nervous?                                         | <input type="checkbox"/> |
| b ...hopeless?                                        | <input type="checkbox"/> |
| c ...restless or fidgety?                             | <input type="checkbox"/> |
| d ...so depressed that nothing<br>could cheer you up? | <input type="checkbox"/> |
| e ...that everything was an effort?                   | <input type="checkbox"/> |
| f ...worthless?                                       | <input type="checkbox"/> |

F2. How much agent fee did you pay to come to Singapore? (in SGD)

☐ none   ☐ ≤\$1,000   ☐ \$1,001-\$5,000   ☐ \$5,001 - \$10,000   ☐ ≥\$10,001

F3. How much do you still owe at this time? (in SGD)

☐ none   ☐ ≤\$1,000   ☐ \$1,001-\$5,000   ☐ \$5,001 - \$10,000   ☐ ≥\$10,001

## Bengali Survey

Background: The purpose of this survey is to better understand the health needs and healthcare issues faced by migrant workers in Singapore. This survey will take approximately **10 minutes** to complete. This survey is voluntary and your responses will be kept confidential.

পৃষ্ঠভূমি: এই সমীক্ষার উদ্দেশ্য, অভিবাসী কর্মীদের স্বাস্থ্য সেবার চাহিদা ও কি কি স্বাস্থ্য সমস্যা সম্মুখীন হয় সিঙ্গাপুর তাহা বোঝা। এই সমীক্ষা সম্পন্ন করতে প্রায় 10 মিনিট সময় লাগবে। এই জরিপ স্বৈচ্ছাসেবামূলক এবং আপনার প্রতিক্রিয়া গোপন রাখা হবে।

### Section A: Personal and Sociodemographic Information

A1. Age বয়স: \_\_\_\_\_

A2. Gender লিঙ্গ: Male / Female

A3. Nationality জাতীয়তা:

☐ Bangladeshi ☐ Chinese ☐ Indian ☐ Burmese ☐ Filipino ☐ Others: \_\_\_\_\_

A4. Marital Status বৈবাহিক অবস্থা: Single অবিবাহিত / Married বিবাহিত / Widowed বিপত্তিক / Separated পৃথগীকৃত

A5. No. of people supported কতজনকে সাহায্য করেন: \_\_\_\_\_

A6. Work Industry কার্য শিল্প:

☐ Construction ☐ Shipyard/Marine ☐ Food and Beverages ☐ Maintenance  
নির্মান শিল্প জাহাজ নির্মান শিল্প খাদ্য এবং পানিও রক্ষণাবেক্ষণ

☐ Unemployed ☐ Others (please specify): \_\_\_\_\_  
বেকার অন্যকাজ ( উল্লেখ করুন )

A7. Highest Education completed সর্বোচ্চ শিক্ষাকতা যোগ্যতাঃ:

☐ Primary or less প্রাথমিক বা কম ☐ Secondary মাধ্যমিক ☐ Post-secondary পোস্ট মাধ্যমিক

A8. Basic monthly salary (excluding overtime) মাসিক মূল বেতন কত ( overtime ছাড়া): SGD\$ \_\_\_\_\_

A9. Average working hrs/week গড়ে প্রতি সপ্তাহে কত ঘন্টা কাজ করেন: \_\_\_\_\_

A10. No. of rest days/month মাসে কতদিন বিশ্রাম বা ছুটি থাকে: \_\_\_\_\_

A11. Duration in Singapore (years) সিঙ্গাপুরে কত দিন: \_\_\_\_\_

A12. Type of entry visa ভিসার ধরন কি:

☐ Work Permit ☐ 'S' Pass ☐ Employment Pass ☐ Others (please specify): \_\_\_\_\_

A13. Language(s) spoken কোন কোন ভাষা বলতে পারেন:

☐ English ☐ Bengali ☐ Tamil ☐ Hindi ☐ Mandarin ☐ Burmese ☐ Malay

☐ Others: \_\_\_\_\_

## Section B: Healthcare Usage

B1. Have you seen a doctor in Singapore before (besides for your pre-employment medical exam) এর পূর্বে সিংগাপুরে কোন ডাক্তার দেখিয়েছেন ( প্রাক কর্মসংস্থান ডাক্তারি পরীক্ষা ছাড়া )?

☐ Yes ☐ No ☐ Unsure

B2. During the past 12 months, approximately how many times did you visit the following (excluding current clinic visit if applicable) গত ১২ মাসে, নিচের উল্লেখিত ক্লিনিকে (প্রায়) কতবার গিয়েছেন:

Company Doctor ☐ 0 ☐ 1 ☐ 2 ☐ 3 ☐ > 3

Private General Practitioner ☐ 0 ☐ 1 ☐ 2 ☐ 3 ☐ > 3

Healthserve Clinic ☐ 0 ☐ 1 ☐ 2 ☐ 3 ☐ > 3

Government Polyclinic ☐ 0 ☐ 1 ☐ 2 ☐ 3 ☐ > 3

Government Hospital ☐ 0 ☐ 1 ☐ 2 ☐ 3 ☐ > 3

Others (please specify) : \_\_\_\_\_ ☐ 0 ☐ 1 ☐ 2 ☐ 3 ☐ > 3

B3. Have you ever been hospitalized (at least 1 night stay) in Singapore আপনি কি সিংগাপুরে কখনো হাসপাতালে ছিলেন (এক দিনের জন্যেও)?

☐ Yes ☐ No ☐ Unsure

## Section C: Healthcare Affordability

C1a. During your time in Singapore, was there any time when you did not seek medical care because of cost আপনার সিংগাপুরে থাকা অবস্থায়, কখনও কি এমন হয়েছে যে খরচের জন্য বা টাকার অভাবে ডাক্তার দেখাতে পারেন নাই?

☐ Yes ☐ No ☐ Unsure

C1b. During your time in Singapore, was there any time when you needed prescription medications but did not get them because of cost আপনার সিংগাপুরে থাকা অবস্থায়, কখনও কি এমন হয়েছে যে খরচের জন্য বা টাকার অভাবে প্রয়োজনীয় / অপরিহার্য ঔষুধ কিনতে পারেন নাই?

☐ Yes ☐ No ☐ Unsure

C1c. During your time in Singapore, was there ever any time when you needed specialist care (including follow up appointments) or referral to a tertiary hospital but did not do so because of cost আপনার সিংগাপুরে থাকা অবস্থায়, কখনও কি এমন হয়েছে যে খরচের জন্য বা টাকার অভাবে বিশেষজ্ঞ বা অন্য কোন হাসপাতালে যেতে পারেন নাই?

☐ Yes ☐ No ☐ Unsure

C2a. Do you have health insurance আপনার কি স্বাস্থ্য বীমা আছে?

☐ Yes ☐ No ☐ Unsure

C2b. Does your health insurance cover for your আপনার স্বাস্থ্য বীমা কি যথেষ্ট:

Inpatient medical expenses: ☐ Yes (if yes, state amount if known \$\_\_\_\_\_) ☐ No ☐ Unsure  
হাসপাতালের আবাসিক রোগীর চিকিৎসা খরচঃ

Outpatient medical expenses: ☐ Yes (if yes, state amount if known \$\_\_\_\_\_) ☐ No ☐ Unsure

বহির্ব্যাগের রোগির চিকিৎসা খরচ

C2c. Were you provided a copy of your health insurance policy/information on employment আপনাকে কি চাকরির স্বাস্থ্য বীমার কোন কপি বা নমুনা কপি দেওয়া হয়েছে?

☐ Yes ☐ No ☐ Unsure

If Yes, was this provided in your own native language? ☐ Yes ☐ No

যদি হ্যাঁ, এটি কি আপনার নিজস্ব ভাষায় দেওয়া হয়েছে

C3a. If you get **injured while working** and have to be **hospitalized**, who pays for the cost of treatment? (tick all that apply) আপনে যদি কাজের সময় আঘাত প্রাপ্ত হন এবং হাসপাতালে থাকতে হয়, কে চিকিৎসা ব্যয় বহন করে?

☐ Company কোম্পানি ☐ Insurance বীমা ☐ Self নিজে ☐ Don't know জানি না

C3b. If you fall sick (**non work-related**) and have to be **hospitalized**, who pays for the cost of treatment? (tick all that apply) যদি আপনি অসুস্থ হয়ে যান ( কাজ সাথে সম্পর্ক নাই) এবং হাসপাতালে থাকতে হয়, কে চিকিৎসা ব্যয় বহন করে

☐ Company কোম্পানি ☐ Insurance বীমা ☐ Self নিজে ☐ Don't know জানি না

C3c. If you fall sick (**non work-related**) and have to get **outpatient treatment**, who pays for the cost of treatment? (tick all that apply) যদি আপনি অসুস্থ হয়ে যান ( কাজ সাথে সম্পর্ক নাই) এবং বহির্ব্যাগের চিকিৎসা হয়, কে চিকিৎসা ব্যয় বহন করে )

☐ Company কোম্পানি ☐ Insurance বীমা ☐ Self নিজে ☐ Don't know জানি না



#### Section D: Other barriers to access

D1. Does your employer recognize Medical Certificates (MCs) (sick/outpatient leave) from নিম্নলিখিত কোনটির আপনার কোম্পানি চিকিৎসা পত্র স্বীকৃত দেয়:

Company Doctor ☐ Yes ☐ No ☐ Unsure ☐ No company doctor

Private General Practitioner ☐ Yes ☐ No ☐ Unsure

Healthserve Clinic ☐ Yes ☐ No ☐ Unsure

Government Polyclinic/ Hospital ☐ Yes ☐ No ☐ Unsure

D2a. Does your company pay your daily wages if you are on sick/outpatient leave with MC যদি আপনি চিকিৎসা সনদ সহ অসুস্থতার জন্য ছুটিতে থাকেন, আপনার কোম্পানি কি প্রতিদিনের মজুরি পরিশোধ করে?

☐ Yes ☐ No, wages for the day are held ☐ Unsure

D2b. Does your company pay your daily wages if you are on hospitalization leave with MC আপনি চিকিৎসা সনদ সহ অসুস্থতার জন্য হাসপাতালে ভর্তি থাকেন, আপনার কোম্পানি কি প্রতিদিনের মজুরি পরিশোধ করে?

☐ Yes ☐ No, wages for the day are held ☐ Unsure

D2c. Does your company have a policy of only accepting company doctor sick/outpatient leave MCs আপনার কোম্পানির নীতি কি শুধু কোম্পানির ডাক্তারের চিকিৎসা সনদ বা MC গ্রহণ করে?

☐ Yes ☐ No ☐ Unsure ☐ No company doctor

D2d. Have you had your pay deducted because you took sick/outpatient leave, even with an MC আপনার কি কখনও টাকা কেটে রেখেছে আপনার অসুস্থতার জন্য ছুটিতে থাকার জন্য, যদিও MC চিকিৎসা সনদ ছিল?

☐ Yes ☐ No ☐ Unsure Comments(if any): \_\_\_\_\_

D2e. Have you had your pay deducted because you took hospitalization leave, even with an MC আপনার কি কখনও টাকা কেটে রেখেছে আপনার অসুস্থতার জন্য হাসপাতালে ভর্তি থাকার জন্য, যদিও MC চিকিৎসা সনদ ছিল?

☐ Yes ☐ No ☐ Unsure Comments(if any): \_\_\_\_\_

D3a. Do you know of anyone who has had their pay deducted because he took sick/outpatient leave, even with an MC আপনি কি এমন কাউকে চিনেন যে, টাকা কেটে রেখেছে অসুস্থতার জন্য ছুটিতে থাকার জন্য, যদিও MC চিকিৎসা সনদ ছিল?

☐ Yes ☐ No ☐ Unsure

D3b. Do you know of anyone who has had their pay deducted because he took hospitalization leave, even with an MC আপনি কি এমন কাউকে চিনেন যে, টাকা কেটে রেখেছে অসুস্থতার জন্য হাসপাতালে ভর্তি থাকার জন্য, যদিও MC চিকিৎসা সনদ ছিল?

☐ Yes ☐ No ☐ Unsure

D4. Are you afraid of losing your job or being sent home if you fall sick আপনি কি ভীত বা ভয় পান যে অসুস্থ হলে আপনার চাকরি চলে যাবে বা বাড়িতে পাঠিয়ে দিবে?

☐ Yes ☐ No ☐ Unsure

## Section E: General Health Perception

E1. On a scale of 1 to 10, how healthy do you think you are ১ থেকে ১০ স্কেলে, নিজেকে কতটুকু সুস্থ বা সুখি মনে করেন?

|                          |                          |                          |                          |                          |                          |                          |                          |                          |                          |
|--------------------------|--------------------------|--------------------------|--------------------------|--------------------------|--------------------------|--------------------------|--------------------------|--------------------------|--------------------------|
| <input type="checkbox"/> |
| 1                        | 2                        | 3                        | 4                        | 5                        | 6                        | 7                        | 8                        | 9                        | 10                       |

Very unhealthy

Moderate

Very healthy

খুব অসুখি

মোটামুটি

খুব সুখি

E2. On a scale of 1 to 10, how healthy do you think you were before you came to Singapore ১ থেকে ১০ স্কেলে, সিংগাপুর আসার আগে নিজেকে কতটুকু সুস্থ বা সুখি মনে করতেন?

|                          |                          |                          |                          |                          |                          |                          |                          |                          |                          |
|--------------------------|--------------------------|--------------------------|--------------------------|--------------------------|--------------------------|--------------------------|--------------------------|--------------------------|--------------------------|
| <input type="checkbox"/> |
| 1                        | 2                        | 3                        | 4                        | 5                        | 6                        | 7                        | 8                        | 9                        | 10                       |

Very unhealthy

Moderate

Very healthy

খুব অসুখি

মোটামুটি

খুব সুখি

E3a. Do you have any chronic medical problems? (e.g. hypertension, diabetes, asthma etc) আপনার কি কোন দুরারোগ্য বা দীর্ঘস্থায়ী অসুখ আছে? (যেমনঃ উচ্চ রক্ত চাপ, ডায়াবেটিস, হাঁপানি বা শ্বাসকষ্ট)

☐ Yes If Yes, please list: \_\_\_\_\_ ☐ No

\_\_\_\_\_  
\_\_\_\_\_

E3b. If Yes to E3a, do you see a doctor **regularly** for your chronic medical problems আপনি কি এই দুরারোগ্য রোগের জন্য নিয়মিত ডাক্তার দেখান?

☐ Yes ☐ No (If No, Why? \_\_\_\_\_) ☐ NA

## Section F: Kessler-6 Scale

F1. During the past 30 days, about how often did you feel গত ৩০ দিনে, প্রায়ই আপনার কি অনুভব হয়েছে .....

|                                                                          | All of the<br>time<br>সব সময় | Most of<br>the time<br>অধিকাংশ সময় | Some of<br>the time<br>কিছু সময় | A little of<br>the time<br>একটু সময় | None of<br>the time<br>একদমই না |
|--------------------------------------------------------------------------|-------------------------------|-------------------------------------|----------------------------------|--------------------------------------|---------------------------------|
| a ...nervous ?<br>বিচলিত বা মায়ুচাপে ছিলেন                              | <input type="checkbox"/>      | <input type="checkbox"/>            | <input type="checkbox"/>         | <input type="checkbox"/>             | <input type="checkbox"/>        |
| b ...hopeless?<br>নিরাশ বা আশাহীন                                        | <input type="checkbox"/>      | <input type="checkbox"/>            | <input type="checkbox"/>         | <input type="checkbox"/>             | <input type="checkbox"/>        |
| c ...restless or fidgety?<br>অস্তির বা অধৈর্যশীল                         | <input type="checkbox"/>      | <input type="checkbox"/>            | <input type="checkbox"/>         | <input type="checkbox"/>             | <input type="checkbox"/>        |
| d ...so depressed that nothing<br>could cheer you up?<br>বিষণ্ন বা মনমরা | <input type="checkbox"/>      | <input type="checkbox"/>            | <input type="checkbox"/>         | <input type="checkbox"/>             | <input type="checkbox"/>        |
| e ...that everything was an effort?<br>খাটুনি                            | <input type="checkbox"/>      | <input type="checkbox"/>            | <input type="checkbox"/>         | <input type="checkbox"/>             | <input type="checkbox"/>        |
| f ...worthless?<br>নিষকর্মা বা মূল্যহীন                                  | <input type="checkbox"/>      | <input type="checkbox"/>            | <input type="checkbox"/>         | <input type="checkbox"/>             | <input type="checkbox"/>        |

F2. How much agent fee did you pay to come to Singapore? (in SGD) কত হাজার ডলার এজেন্ট ফি পরিশোধ করেছিলেন সিংঙ্গাপরে আসার সময়

☐ none ☐ ≤\$1,000 ☐ \$1,001-\$5,000 ☐ \$5,001 - \$10,000 ☐ ≥\$10,001

F3. How much do you still owe at this time? (in SGD) এখনও কত ডলার ঋণগ্রস্থ আছেন

☐ none ☐ ≤\$1,000 ☐ \$1,001-\$5,000 ☐ \$5,001 - \$10,000 ☐ ≥\$10,001

## Mandarin Survey

Background: The purpose of this survey is to better understand the health needs and healthcare issues faced by migrant workers in Singapore. This survey will take approximately **10 minutes** to complete. This survey is voluntary and your responses will be kept confidential.

这个问卷的目的是为了更好的了解新加坡的外籍劳工在医疗上所面对的问题。它需要大约**10分钟**的时间来完成。参加这个问卷是自愿的。我们会对您所提供的所有信息绝对保密。

### Section A: Personal and Sociodemographic Information

A1. Age年龄: \_\_\_\_\_

A2. Gender性别: Male / Female

A3. Nationality国籍:

☐ Bangladeshi    ☐ Chinese    ☐ Indian    ☐ Burmese    ☐ Filipino    ☐ Others: \_\_\_\_\_

A4. Marital Status婚姻状况: Single单身 / Married已婚 / Widowed丧偶 / Separated 离婚

A5. No. of people supported供养亲友成员的人数: \_\_\_\_\_

A6. Work Industry工作行业:

☐ Construction    ☐ Shipyard/Marine    ☐ Food and Beverages    ☐ Maintenance  
建筑    海运    餐饮    维修

☐ Unemployed    ☐ Others (please specify): \_\_\_\_\_  
无业    其他（请注明）

A7. Highest Education completed最高教育程度:

☐ Primary or less小学或更低    ☐ Secondary初中    ☐ Post-secondary高中或更高

A8. Basic monthly salary (excluding overtime) 基本收入（不包括加班费）: SGD\$ \_\_\_\_\_

A9. Average working hrs/week平均工作时间（一个礼拜）: \_\_\_\_\_

A10. No. of rest days/month每个月休日的次数: \_\_\_\_\_

A11. Duration in Singapore (years) 待在新加坡的时间: \_\_\_\_\_

A12. Type of entry visa签证种类:

☐ Work Permit    ☐ 'S' Pass    ☐ Employment Pass    ☐ Others (please specify): \_\_\_\_\_

A13. Language(s) spoken沟通语言:

☐ English    ☐ Bengali    ☐ Tamil    ☐ Hindi    ☐ Mandarin    ☐ Burmese    ☐ Malay

☐ Others: \_\_\_\_\_

## Section B: Healthcare Usage

B1. Have you seen a doctor in Singapore before (besides for your pre-employment medical exam) 除了就业前的体检，您有看病过吗？

☐ Yes ☐ No ☐ Unsure

B2. During the past 12 months, approximately how many times did you visit the following (excluding current clinic visit if applicable) 在过去的12个月里，您有去以下的诊所或医院看病过几次：

Company Doctor 公司诊所 ☐ 0 ☐ 1 ☐ 2 ☐ 3 ☐ > 3

Private General Practitioner 私人诊所 ☐ 0 ☐ 1 ☐ 2 ☐ 3 ☐ > 3

Healthserve Clinic 康侍诊所 ☐ 0 ☐ 1 ☐ 2 ☐ 3 ☐ > 3

Government Polyclinic 政府诊所 ☐ 0 ☐ 1 ☐ 2 ☐ 3 ☐ > 3

Government Hospital 政府医院 ☐ 0 ☐ 1 ☐ 2 ☐ 3 ☐ > 3

Others 其他 (please specify) : \_\_\_\_\_ ☐ 0 ☐ 1 ☐ 2 ☐ 3 ☐ > 3

B3. Have you ever been hospitalized (at least 1 night stay) in Singapore 您有在新加坡住院过吗？（至少一晚）？

☐ Yes ☐ No ☐ Unsure

## Section C: Healthcare Affordability

C1a. During your time in Singapore, was there any time when you did not seek medical care because of cost 您在新加坡的期间，是否曾经因为看病的价格而放弃治疗？

☐ Yes ☐ No ☐ Unsure

C1b. During your time in Singapore, was there any time when you needed prescription medications but did not get them because of cost 您在新加坡的期间，是否曾经因为药的价格而放弃购买需要的药物？

☐ Yes ☐ No ☐ Unsure

C1c. During your time in Singapore, was there ever any time when you needed specialist care (including follow up appointments) or referral to a tertiary hospital but did not do so because of cost 您在新加坡的期间，是否曾经因为看病的价格而放弃专科护理（包括复诊）或转诊到医院？

☐ Yes ☐ No ☐ Unsure

C2a. Do you have health insurance 您有医疗保险吗？

☐ Yes ☐ No ☐ Unsure

C2b. Does your health insurance cover for your 您的医疗保险是否有包括：

Inpatient medical expenses: ☐ Yes (if yes, state amount if known \$\_\_\_\_\_) ☐ No ☐ Unsure  
住院费 如果有, 请陈诉受保的金额 (如果您知道)

Outpatient medical expenses: ☐ Yes (if yes, state amount if known \$\_\_\_\_\_) ☐ No ☐ Unsure  
门诊费 如果有, 请陈诉受保的金额 (如果您知道)

C2c. Were you provided a copy of your health insurance policy/information on employment 您是否有接受过关于就业的医疗保险/资讯?

☐ Yes ☐ No ☐ Unsure

If Yes, was this provided in your own native language? 如果有, 它是否是以您的母语为主? ☐ Yes ☐ No

C3a. If you get **injured while working** and have to be **hospitalized**, who pays for the cost of treatment? (tick all that apply) 如果您因工伤住院, 谁会付治疗的费用?

☐ Company 公司 ☐ Insurance 保险公司 ☐ Self 自己 ☐ Don't know 不知道

C3b. If you fall sick (**non work-related**) and have to be **hospitalized**, who pays for the cost of treatment? (tick all that apply) 您如果因为工作以外的原因而需要住院, 谁会付住院的费用?

☐ Company 公司 ☐ Insurance 保险公司 ☐ Self 自己 ☐ Don't know 不知道

C3c. If you fall sick (**non work-related**) and have to get **outpatient treatment**, who pays for the cost of treatment? (tick all that apply) 您如果因为工作以外的原因而需要看病, 谁会付门诊的费用?

☐ Company 公司 ☐ Insurance 保险公司 ☐ Self 自己 ☐ Don't know 不知道

#### Section D: Other barriers to access

D1. Does your employer recognize Medical Certificates (MCs) (sick/outpatient leave) from 您的雇主接受以下哪些场所的医生所开的病假单:

Company Doctor 公司诊所 ☐ Yes ☐ No ☐ Unsure ☐ No company doctor

Private General Practitioner 私人诊所 ☐ Yes ☐ No ☐ Unsure

Healthserve Clinic 康侍诊所 ☐ Yes ☐ No ☐ Unsure

Government Polyclinic/ Hospital 政府诊所/医院 ☐ Yes ☐ No ☐ Unsure

D2a. Does your company pay your daily wages if you are on sick/outpatient leave with MC 如果您在休有病假单的病假时，您的雇主会支付您的工资吗？

☐ Yes ☐ No, wages for the day are held ☐ Unsure

D2b. Does your company pay your daily wages if you are on hospitalization leave with MC 如果您在休有病假单的住院假期时，您的雇主会支付您的工资吗？

☐ Yes ☐ No, wages for the day are held ☐ Unsure

D2c. Does your company have a policy of only accepting company doctor sick/outpatient leave MCs 您的公司政策是否只是限于公司诊所开的病假单？

☐ Yes ☐ No ☐ Unsure ☐ No company doctor

D2d. Have you had your pay deducted because you took sick/outpatient leave, even with an MC 您是否曾经即便是有病假单但因为休病假而被扣工资？

☐ Yes ☐ No ☐ Unsure Comments(if any): \_\_\_\_\_

D2e. Have you had your pay deducted because you took hospitalization leave, even with an MC 您是否知道有谁曾经即便是有病假单但因为休病假而被扣工资？

☐ Yes ☐ No ☐ Unsure Comments(if any): \_\_\_\_\_

D3a. Do you know of anyone who has had their pay deducted because he took sick/outpatient leave, even with an MC 您是否知道有谁曾经即便是有病假单但因为休住院假期而被扣工资？

☐ Yes ☐ No ☐ Unsure

D3b. Do you know of anyone who has had their pay deducted because he took hospitalization leave, even with an MC 您是否知道有谁曾经即便是有病假单但因为休住院假期而被扣工资？

☐ Yes ☐ No ☐ Unsure

D4. Are you afraid of losing your job or being sent home if you fall sick 您是否害怕因为生病而被解雇或送回国？

☐ Yes ☐ No ☐ Unsure

## Section E: General Health Perception

E1. On a scale of 1 to 10, how healthy do you think you are 以1到10为比例，您认为自己有多健康？

☐ ☐ ☐ ☐ ☐ ☐ ☐ ☐ ☐ ☐

1 2 3 4 5 6 7 8 9 10

Very unhealthy

Moderate

Very healthy

非常不健康

中等

非常健康

E2. On a scale of 1 to 10, how healthy do you think you were before you came to Singapore 以1到10为比例，您认为自己在来新加坡前有多健康？

☐ ☐ ☐ ☐ ☐ ☐ ☐ ☐ ☐ ☐

1 2 3 4 5 6 7 8 9 10

Very unhealthy

Moderate

Very healthy

非常不健康

中等

非常健康

E3a. Do you have any chronic medical problems? (e.g. hypertension, diabetes, asthma etc) 你是否患有慢性疾病？（比如，高血压，糖尿病，哮喘病）如果有，请列举。

☐ Yes If Yes, please list: \_\_\_\_\_ ☐ No

\_\_\_\_\_  
\_\_\_\_\_

E3b. If Yes to E3a, do you see a doctor **regularly** for your chronic medical problems 如果您在E3a中的答案是‘有’，请问您有因为自己的慢性病而常看病吗？

☐ Yes ☐ No (If No, Why? \_\_\_\_\_) ☐ NA



**Section F: Kessler-6 Scale**

F1. During the past 30 days, about how often did you feel 下面的问题是询问您过去 30 天中的情绪。在过去的 30 天里，您有多常感到以下的感觉.....

|                                                                            | All of the<br>time<br>全部时间 | Most of<br>the time<br>大部分时间 | Some of<br>the time<br>一部分时间 | A little of<br>the time<br>偶尔 | None of<br>the time<br>无 |
|----------------------------------------------------------------------------|----------------------------|------------------------------|------------------------------|-------------------------------|--------------------------|
| a ...nervous ?<br>紧张                                                       | <input type="checkbox"/>   | <input type="checkbox"/>     | <input type="checkbox"/>     | <input type="checkbox"/>      | <input type="checkbox"/> |
| b ...hopeless?<br>绝望                                                       | <input type="checkbox"/>   | <input type="checkbox"/>     | <input type="checkbox"/>     | <input type="checkbox"/>      | <input type="checkbox"/> |
| c ...restless or fidgety?<br>不安或烦躁                                         | <input type="checkbox"/>   | <input type="checkbox"/>     | <input type="checkbox"/>     | <input type="checkbox"/>      | <input type="checkbox"/> |
| d ...so depressed that nothing<br>could cheer you up?<br>太沮丧以至于什么都不能让您愉快起来 | <input type="checkbox"/>   | <input type="checkbox"/>     | <input type="checkbox"/>     | <input type="checkbox"/>      | <input type="checkbox"/> |
| e ...that everything was an effort?<br>做每一件事情都很费劲                          | <input type="checkbox"/>   | <input type="checkbox"/>     | <input type="checkbox"/>     | <input type="checkbox"/>      | <input type="checkbox"/> |
| f ...worthless?<br>无价值                                                     | <input type="checkbox"/>   | <input type="checkbox"/>     | <input type="checkbox"/>     | <input type="checkbox"/>      | <input type="checkbox"/> |

F2. How much agent fee did you pay to come to Singapore? (in SGD) 您支付了多少经纪费才能来新加坡（新币）

☐ none   ☐ ≤\$1,000   ☐ \$1,001-\$5,000   ☐ \$5,001 - \$10,000   ☐ ≥\$10,001

F3. How much do you still owe at this time? (in SGD) 至今，您还欠多少钱（新币）

☐ none   ☐ ≤\$1,000   ☐ \$1,001-\$5,000   ☐ \$5,001 - \$10,000   ☐ ≥\$10,001

## Tamil Survey

Background: The purpose of this survey is to better understand the health needs and healthcare issues faced by migrant workers in Singapore. This survey will take approximately **10 minutes** to complete. This survey is voluntary and your responses will be kept confidential.

இந்த ஆராய்ச்சியின் நோக்கம் வெளி நாட்டு தொழிலாளரின் மருத்துவ தேவை கஷ்டங்களை அறிய. இதை பூர்த்தி செய்ய 10 நிமிடங்கள் எடுக்கும். உங்களது விவரங்களும் பதிலும் இரகசியமாகவும் பாதுகாப்பாகவும் இருக்கும்.

### Section A: Personal and Sociodemographic Information

A1. Age வயது: \_\_\_\_\_

A2. Gender பாலனம் - ஆணா - பெணா: Male / Female

A3. Nationality எந்த தேசத்தை சேர்ந்தவர்:

☐ Bangladeshi ☐ Chinese ☐ Indian ☐ Burmese ☐ Filipino ☐ Others: \_\_\_\_\_

A4. Marital Status விவாக அந்தஸ்து: Single திருமணமாகாதவர் / Married திருமணமானவர் / Widowed மனைவியை இழந்தவர் - கணவனையிழந்தவர் / Separated விவாகரத்தானவர்

A5. No. of people supported குடும்பத்தில் எத்தனைபேரை தாங்குகிறீர்கள்: \_\_\_\_\_

A6. Work Industry வேலை செய்யும் கம்பெனி:

☐ Construction கட்டுமானத்தொழில் ☐ Shipyard/Marine கப்பலில் வேலை ☐ Food and Beverages உணவு பானங்கள் விற்பனை ☐ Maintenance பராமரிப்பு- பழுதுபார்க்கும் தொழில்  
☐ Unemployed வேலை செய்யவில்லை ☐ Others (please specify): \_\_\_\_\_ மற்றவை

A7. Highest Education completed அதிக படிப்பு நிலை:

☐ Primary or less துவக்கப்பள்ளி வரை ☐ Secondary உயர்நிலை பள்ளி வரை  
☐ Post-secondary மேல் நிலைப் பள்ளி வரை

A8. Basic monthly salary (excluding overtime) மாத வருமானம் (வோவர் டைம் தவிர்த்து) : SGD\$ \_\_\_\_\_

A9. Average working hrs/week வாரம் எத்தனை மணிநேரம் வேலையுண்டு: \_\_\_\_\_

A10. No. of rest days/month மாதம் எத்தனை மணிநேரம் ஓய்வு உண்டு: \_\_\_\_\_

A11. Duration in Singapore (years) சிங்கையில் எத்தனை ஆண்டு பணிபுரிகிறீர்கள்: \_\_\_\_\_

A12. Type of entry visa சிங்கப்பூருக்கு எந்த விசாவில் வந்தீர்கள்:

☐ Work Permit ☐ 'S' Pass ☐ Employment Pass ☐ Others (please specify): \_\_\_\_\_

A13. Language(s) spoken நீங்கள் பேசும் மொழி:

☐ English ☐ Bengali ☐ Tamil ☐ Hindi ☐ Mandarin ☐ Burmese ☐ Malay

☐ Others: \_\_\_\_\_

## Section B: Healthcare Usage

B1. Have you seen a doctor in Singapore before (besides for your pre-employment medical exam) வேலைக்குச் செருமன் மருத்துவரிடம் சிகிச்சை பெற்றதுண்டா (மெடிகல் செக்கப் தவிர்த்து)?

☐ Yes ☐ No ☐ Unsure

B2. During the past 12 months, approximately how many times did you visit the following (excluding current clinic visit if applicable) கடந்த 12 மாதங்களில் எத்தனை முறை கீழ்க்கண்ட மருத்துவரிடம் சிகிச்சை பெற்றீர்கள்:

|                                                  |                                                                                                                                          |
|--------------------------------------------------|------------------------------------------------------------------------------------------------------------------------------------------|
| Company Doctor கம்பனி மருத்துவர்                 | <input type="checkbox"/> 0 <input type="checkbox"/> 1 <input type="checkbox"/> 2 <input type="checkbox"/> 3 <input type="checkbox"/> > 3 |
| Private General Practitioner பிரைவேட் மருத்துவர் | <input type="checkbox"/> 0 <input type="checkbox"/> 1 <input type="checkbox"/> 2 <input type="checkbox"/> 3 <input type="checkbox"/> > 3 |
| Healthserve Clinic ஹெல்த்சர்வ் கிளினிக்          | <input type="checkbox"/> 0 <input type="checkbox"/> 1 <input type="checkbox"/> 2 <input type="checkbox"/> 3 <input type="checkbox"/> > 3 |
| Government Polyclinic அரசாங்க பாலிக்கிளினிக்     | <input type="checkbox"/> 0 <input type="checkbox"/> 1 <input type="checkbox"/> 2 <input type="checkbox"/> 3 <input type="checkbox"/> > 3 |
| Government Hospital அரசாங்க ஆஸ்பத்திரி           | <input type="checkbox"/> 0 <input type="checkbox"/> 1 <input type="checkbox"/> 2 <input type="checkbox"/> 3 <input type="checkbox"/> > 3 |
| Others (please specify) மற்றவை : _____           | <input type="checkbox"/> 0 <input type="checkbox"/> 1 <input type="checkbox"/> 2 <input type="checkbox"/> 3 <input type="checkbox"/> > 3 |

B3. Have you ever been hospitalized (at least 1 night stay) in Singapore சிங்கப்பூரில் ஆஸ்பத்திரியில் ஒரு நாளாகிலும் அட்மிட் ஆனதுண்டா?

☐ Yes ஆம் ☐ No இல்லை ☐ Unsure ஞாபகமில்லை

## Section C: Healthcare Affordability

C1a. During your time in Singapore, was there any time when you did not seek medical care because of cost சிங்கப்பூரில் வேலை செய்யும் நாட்களில் பண கஷ்டத்தினால் ஆஸ்பத்திரியில் மருத்துவரிடம் சோதனை பெற்றுக்கொள்ள முடியாமலிருந்ததுண்டா?

☐ Yes ஆம் ☐ No இல்லை ☐ Unsure ஞாபகமில்லை

C1b. During your time in Singapore, was there any time when you needed prescription medications but did not get them because of cost சிங்கப்பூரில் வேலை செய்யும் நாட்களில் பண கஷ்டத்தினால் ஆஸ்பத்திரியில் மருத்துவரிடம் மருந்து சீட்டு பெற்றுக்கொள்ள முடியாமலிருந்ததுண்டா?

☐ Yes ஆம் ☐ No இல்லை ☐ Unsure ஞாபகமில்லை

C1c. During your time in Singapore, was there ever any time when you needed specialist care (including follow up appointments) or referral to a tertiary hospital but did not do so because of cost சிங்கப்பூரில் வேலை செய்யும் நாட்களில் பண கஷ்டத்தினால் பெரிய ஆஸ்பத்திரியில் இன்பெஷல் மருத்துவரிடம் சிகிச்சை பெறாமலிருந்ததுண்டா?

☐ Yes ஆம் ☐ No இல்லை ☐ Unsure ஞாபகமில்லை

C2a. Do you have health insurance உங்களுக்கு மருத்தவ காப்பீடு உண்டா?

☐ Yes ஆம் ☐ No இல்லை ☐ Unsure ஞாபகமில்லை

C2b. Does your health insurance cover for your உங்கள் மருத்தவ காப்பீடு கீழ்க்கண்டவற்றில் எதற்கு பயன்படுகிறது:

Inpatient medical expenses: ☐ Yes (if yes, state amount if known \$\_\_\_\_\_) ☐ No ☐ Unsure  
ஆஸ்பத்திரியில் உள் நோயாளியாக (ஆம் என்றால் எவ்வளவு தொகை)

Outpatient medical expenses: ☐ Yes (if yes, state amount if known \$\_\_\_\_\_) ☐ No ☐ Unsure  
ஆஸ்பத்திரியில் புற நோயாளியாக (ஆம் என்றால் எவ்வளவு தொகை)

C2c. Were you provided a copy of your health insurance policy/information on employment மருத்தவ காப்பீடு பாலிசி நகல் கம்பெனி முதலாளி வேலைக்குச் செரும்போது கொடுத்தாறா?

☐ Yes ஆம் ☐ No இல்லை ☐ Unsure ஞாபகமில்லை

If Yes, was this provided in your own native language? ☐ Yes ☐ No  
ஆம் என்றால் காப்பீடு நகல் உங்கள் தாய் மொழியில் தரப்பட்டதா

C3a. If you get injured while working and have to be hospitalized, who pays for the cost of treatment? (tick all that apply) வேலை செய்யும்போது வேலையில் விபத்து நேரிட்டு காயமுற்று ஆஸ்பத்திரியில் செர்ந்தால் சிகிச்சை செலவு யார் பார்பது ?

☐ Company கம்பெனி ☐ Insurance மருத்தவ காப்பீடு ☐ Self சுயமாக ☐ Don't know தெரியாது

C3b. If you fall sick (non work-related) and have to be hospitalized, who pays for the cost of treatment? (tick all that apply) வேலை செய்யும்போது வேலையில் விபத்துயில்லாமல் வியாதிவந்து ஆஸ்பத்திரியில் அட்மிட் ஆனால் செலவு யார் பார்பது

☐ Company கம்பெனி ☐ Insurance மருத்தவ காப்பீடு ☐ Self சுயமாக ☐ Don't know தெரியாது

C3c. If you fall sick (non work-related) and have to get outpatient treatment, who pays for the cost of treatment? (tick all that apply) வேலை செய்யும்போது வேலையில் விபத்துயில்லாமல் வியாதிவந்தால் வெளியில் மருத்துவரை பார்க்க செலவு யார் பார்பது

☐ Company கம்பெனி ☐ Insurance மருத்தவ காப்பீடு ☐ Self சுயமாக ☐ Don't know தெரியாது

#### Section D: Other barriers to access

D1. Does your employer recognize Medical Certificates (MCs) (sick/outpatient leave) from கம்பெனி முதலாளி கீழ் கண்ட மருத்துவ விடுப்புகளை அங்கிகரிப்பாரா :

Company Doctor கம்பெனி டாக்டர் ☐ Yes ☐ No ☐ Unsure ☐ No company doctor

Private General Practitioner பிரைவேட் டாக்டர் ☐ Yes ☐ No ☐ Unsure

Healthserve Clinic ஹெல்த்ஸ் சர்வ் கிளினிக் ☐ Yes ☐ No ☐ Unsure

Government Polyclinic/ Hospital அரசாங்க பாலி கிளினிக் ☐ Yes ☐ No ☐ Unsure

D2a. Does your company pay your daily wages if you are on sick/outpatient leave with MC கம்பெனி முதலாளி உங்களுக்கு வியாதிவந்தால் உங்கள் மருத்துவ விடுப்பு அங்கிகரித்து தின கூலி சம்பளம் தருவாரா ?

☐ Yes ஆம் ☐ No, wages for the day are held அன்று சம்பளம் கிடையாது ☐ Unsure சரியாக தெரியாது

D2b. Does your company pay your daily wages if you are on hospitalization leave with MC கம்பெனி முதலாளி உங்களுக்கு வியாதிவந்து அட்மிட் ஆகி உங்கள் மருத்துவ விடுப்பு அங்கிகரித்து விடுப்பு நாட்களின் தின கூலி சம்பளம் தருவாரா ?

☐ Yes ஆம் ☐ No, wages for the day are held அன்று சம்பளம் கிடையாது ☐ Unsure சரியாக தெரியாது

D2c. Does your company have a policy of only accepting company doctor sick/outpatient leave MCs கம்பெனி முதலாளி கம்பெனி டாக்டர் மருத்துவ விடுப்பு மட்டும் அங்கிகரிப்பதற்கு பாலிசி உண்டா ?

☐ Yes ஆம் ☐ No இல்லை ☐ Unsure ஞாபகமில்லை ☐ No company doctor கம்பெனி டாக்டர் இல்லை

D2d. Have you had your pay deducted because you took sick/outpatient leave, even with an MC கம்பெனி முதலாளி உங்கள் வியாதிவிமித்தம் வேலைக்கு செல்லமுடியாமல் - மருத்துவ விடுப்பு இருந்தும் தின கூலி சம்பளம் தராமல்விட்டதுண்டா ?

☐ Yes ஆம் ☐ No இல்லை ☐ Unsure ஞாபகமில்லை Comments(if any): \_\_\_\_\_

D2e. Have you had your pay deducted because you took hospitalization leave, even with an MC கம்பெனி முதலாளி உங்களுக்கு வியாதிவந்து அட்மிட் ஆகி உங்களுக்கு மருத்துவ விடுப்பு இருந்தும் தின கூலி சம்பளம் தராமல்விட்டதுண்டா ?

☐ Yes ஆம் ☐ No இல்லை ☐ Unsure ஞாபகமில்லை Comments(if any): \_\_\_\_\_

D3a. Do you know of anyone who has had their pay deducted because he took sick/outpatient leave, even with an MC உங்களுக்கு தெரிந்தவர் யாராவது வியாதிவந்து மருத்துவ விடுப்பு இருந்தும் தின கூலி சம்பளம் கம்பெனியில் தராமல்விட்டதுண்டா ?

☐ Yes ஆம் ☐ No இல்லை ☐ Unsure ஞாபகமில்லை

D3b. Do you know of anyone who has had their pay deducted because he took hospitalization leave, even with an MC உங்களுக்கு தெரிந்தவர் யாராவது வியாதிவந்து அட்மிட் ஆகி மருத்துவ விடுப்பு இருந்தும் தின கூலி சம்பளம் கம்பெனியில் தராமல்விட்டதுண்டா ?

☐ Yes ஆம் ☐ No இல்லை ☐ Unsure ஞாபகமில்லை

D4. Are you afraid of losing your job or being sent home if you fall sick உங்கள் வியாதிவிமித்தம் வேலைக்கு செல்லமுடியாமலிருந்தால் வேலையை இழந்துவிடுவோம், வீட்டிற்கு அனுப்பி விடுவார்கள் என்ற பயமுண்டா ?

☐ Yes ஆம் ☐ No இல்லை ☐ Unsure ஞாபகமில்லை

## Section E: General Health Perception

E1. On a scale of 1 to 10, how healthy do you think you are 1 மதல்10 வரையுள்ள அளவீட்டில் உங்கள் உடல் நலம் எந்த அளவுகுறியில் உள்ளது ?

☐ 1 ☐ 2 ☐ 3 ☐ 4 ☐ 5 ☐ 6 ☐ 7 ☐ 8 ☐ 9 ☐ 10

Very unhealthy உடல் நலமில்லை Moderate உடல் நலம் தேவலம் Very healthy உடல் நிலை நல்ல ஆரோக்கியம்

E2. On a scale of 1 to 10, how healthy do you think you were before you came to Singapore 1 மதல்10 வரையுள்ள அளவீட்டில் உங்கள் உடல் நலம் எந்த அளவுகுறியில் நீங்கள் சிங்கை வரும்முன் இருந்தது ?

☐ 1 ☐ 2 ☐ 3 ☐ 4 ☐ 5 ☐ 6 ☐ 7 ☐ 8 ☐ 9 ☐ 10

Very unhealthy உடல் நலமில்லை Moderate உடல் நலம் தேவலம் Very healthy உடல் நிலை நல்ல ஆரோக்கியம்

E3a. Do you have any chronic medical problems? (e.g. hypertension, diabetes, asthma etc) உங்களுக்கு நீண்டகாலமான வியாதி உண்டா உம் இரத்தக்கொதிப்பு, ஆஸ்துமா, சர்க்கரை வியாதி?ஆம் என்றால் என்ன வியாதி

☐ Yes If Yes, please list: \_\_\_\_\_ ☐ No

E3b. If Yes to E3a, do you see a doctor regularly for your chronic medical problems உங்களுக்கு நீண்டகாலமான வியாதி உம் இரத்தக்கொதிப்பு, ஆஸ்துமா, சர்க்கரை வியாதி இருந்தால் முறையாக டாக்டரிடம் சிகிச்சை எடுக்கின்றீர்களா ?

☐ Yes ☐ No (If No, Why? \_\_\_\_\_) ☐ NA

## Section F: Kessler-6 Scale

F1. During the past 30 days, about how often did you feel கடந்த 30 நாட்களில் எத்தனை முறை கீழ்க்கண்ட பிரச்சனையை உணர்ந்தீர்கள் .....

|                                                                                                    | All of the time<br>ஏல்லா நேரமும் | Most of the time<br>அதிகபட்சநேரங்களில் | Some of the time<br>சில நேரங்களில் | A little of the time<br>கொஞ்ச நேரமட்டும் | None of the time<br>எந்த நேரமும் இல்லை |
|----------------------------------------------------------------------------------------------------|----------------------------------|----------------------------------------|------------------------------------|------------------------------------------|----------------------------------------|
| a ...nervous ?<br>நரம்பு தளரக்கூடிய பய உணர்வு                                                      | <input type="checkbox"/>         | <input type="checkbox"/>               | <input type="checkbox"/>           | <input type="checkbox"/>                 | <input type="checkbox"/>               |
| b ...hopeless?<br>நம்பிக்கையின்மை                                                                  | <input type="checkbox"/>         | <input type="checkbox"/>               | <input type="checkbox"/>           | <input type="checkbox"/>                 | <input type="checkbox"/>               |
| c ...restless or fidgety?<br>அமைதியின்மை, துக்கமின்மை                                              | <input type="checkbox"/>         | <input type="checkbox"/>               | <input type="checkbox"/>           | <input type="checkbox"/>                 | <input type="checkbox"/>               |
| d ...so depressed that nothing<br>could cheer you up?<br>மனஉளைச்சல் மகிழ்ச்சிதரக்கூடியதெதுவுமில்லை | <input type="checkbox"/>         | <input type="checkbox"/>               | <input type="checkbox"/>           | <input type="checkbox"/>                 | <input type="checkbox"/>               |
| e ...that everything was an effort?<br>எல்லாம் கடினம்                                              | <input type="checkbox"/>         | <input type="checkbox"/>               | <input type="checkbox"/>           | <input type="checkbox"/>                 | <input type="checkbox"/>               |
| f ...worthless?<br>ஒன்றும் பிரயோஜனமில்லை                                                           | <input type="checkbox"/>         | <input type="checkbox"/>               | <input type="checkbox"/>           | <input type="checkbox"/>                 | <input type="checkbox"/>               |

F2. How much agent fee did you pay to come to Singapore? (in SGD) சிங்கப்பூர் வருவதற்கு ஏஜண்ட் பணம் எவ்வளவு கட்டினீர்கள் சிங்கப்பூர் டாலரில்

☐ none ☐ ≤\$1,000 ☐ \$1,001-\$5,000 ☐ \$5,001 - \$10,000 ☐ ≥\$10,001

F3. How much do you still owe at this time? (in SGD) சிங்கப்பூர் டாலரில் இன்னும் எவ்வளவு கடனுள்ளது

☐ none ☐ ≤\$1,000 ☐ \$1,001-\$5,000 ☐ \$5,001 - \$10,000 ☐ ≥\$10,001

**APPENDIX B: Kessler-6 Scores of non-domestic migrant workers (by nationality), HealthServe clinics and foreign worker dormitory, 23 July- 28 August, 2016**

**A) Bangladeshi (n= 283)**

| During the past 30 days, about how often did you feel...<br>no. (%) |                           |                            |                            |                                |                            |
|---------------------------------------------------------------------|---------------------------|----------------------------|----------------------------|--------------------------------|----------------------------|
| (score)                                                             | All of the<br>time<br>(5) | Most of<br>the time<br>(4) | Some of<br>the time<br>(3) | A little of<br>the time<br>(2) | None of<br>the time<br>(1) |
| ...nervous?                                                         | 4 (1.4)                   | 16 (5.7)                   | 77 (27.2)                  | 29 (10.2)                      | 157 (55.5)                 |
| ...hopeless?                                                        | 9 (3.2)                   | 8 (2.8)                    | 49 (17.3)                  | 19 (6.7)                       | 198 (70.0)                 |
| ...restless or fidgety?                                             | 6 (2.1)                   | 7 (2.5)                    | 54 (19.1)                  | 24 (8.5)                       | 192 (67.8)                 |
| ...so depressed that nothing could<br>cheer you up?                 | 7 (2.5)                   | 6 (2.1)                    | 65 (23.0)                  | 19 (6.7)                       | 186 (65.7)                 |
| ...that everything was worth an<br>effort?                          | 17 (6.0)                  | 17 (6.0)                   | 67 (23.7)                  | 21 (7.4)                       | 161 (56.9)                 |
| ...worthless?                                                       | 4 (1.4)                   | 9 (3.2)                    | 30 (10.6)                  | 16 (5.7)                       | 224 (79.2)                 |

**B) Indian (n=84)**

| During the past 30 days, about how often did you feel...<br>no. (%) |                           |                            |                            |                                |                            |
|---------------------------------------------------------------------|---------------------------|----------------------------|----------------------------|--------------------------------|----------------------------|
| (score)                                                             | All of the<br>time<br>(5) | Most of<br>the time<br>(4) | Some of<br>the time<br>(3) | A little of<br>the time<br>(2) | None of<br>the time<br>(1) |
| ...nervous?                                                         | 0 (0)                     | 0 (0)                      | 13 (15.5)                  | 13 (15.5)                      | 58 (69.0)                  |
| ...hopeless?                                                        | 0 (0)                     | 2 (2.4)                    | 8 (9.5)                    | 5 (6.0)                        | 69 (82.1)                  |
| ...restless or fidgety?                                             | 0 (0)                     | 5 (6.0)                    | 12 (14.5)                  | 8 (9.6)                        | 58 (69.9)                  |
| ...so depressed that nothing could<br>cheer you up?                 | 1 (1.2)                   | 2 (2.4)                    | 11 (13.2)                  | 8 (9.5)                        | 62 (73.8)                  |
| ...that everything was worth an<br>effort?                          | 2 (2.4)                   | 2 (2.4)                    | 9 (10.7)                   | 8 (9.5)                        | 63 (75.0)                  |
| ...worthless?                                                       | 0 (0)                     | 1 (1.2)                    | 7 (8.3)                    | 6 (7.1)                        | 70 (83.3)                  |

**C) Chinese (n=51)**

| During the past 30 days, about how often did you feel...<br>no. (%) |                           |                            |                            |                                |                            |
|---------------------------------------------------------------------|---------------------------|----------------------------|----------------------------|--------------------------------|----------------------------|
| (score)                                                             | All of the<br>time<br>(5) | Most of<br>the time<br>(4) | Some of<br>the time<br>(3) | A little of<br>the time<br>(2) | None of<br>the time<br>(1) |
| ...nervous?                                                         | 3 (5.9)                   | 0 (0)                      | 6 (11.8)                   | 5 (9.8)                        | 37 (72.5)                  |
| ...hopeless?                                                        | 0 (0)                     | 2 (2.4)                    | 8 (9.5)                    | 5 (6.0)                        | 69 (82.1)                  |
| ...restless or fidgety?                                             | 0 (0)                     | 2 (3.9)                    | 7 (13.7)                   | 5 (9.8)                        | 37 (72.5)                  |
| ...so depressed that nothing could<br>cheer you up?                 | 0 (0)                     | 3 (5.9)                    | 7 (13.7)                   | 8 (15.7)                       | 33 (64.7)                  |
| ...that everything was worth an<br>effort?                          | 0 (0)                     | 3 (5.9)                    | 8 (15.7)                   | 8 (15.7)                       | 32 (62.7)                  |
| ...worthless?                                                       | 0 (0)                     | 2 (3.9)                    | 2 (3.9)                    | 5 (9.8)                        | 42 (82.4)                  |
